# Supplementary material for: Influence of silver ions on the growth mode of platinum on gold nanorods
Source: Royal Society of Chemistry journal article supplement (doi:10.1039/b606887a), 2006-01-01
Supplement: b606887a.pdf [file b606887a.pdf]

Supplementary material (ESI) for Journal of Materials Chemistry  
This journal is © The Royal Society of Chemistry 2006

**Influence of Silver Ions on the Growth Mode of Platinum on Gold nanorods**

Marek Grzelczak, Jorge Pérez-Juste, Benito Rodríguez-González, Luis M. Liz-Marzán\*

Departamento de Química Física, Universidade de Vigo, 36310 Vigo, Spain

**SUPPORTING INFORMATION**

### Description of control experiments:

Since removal of  $\text{Ag}^+$  through cleaning of the Au nanorod dispersion also involved removing other species such as  $\text{NO}_3^-$  and  $\text{HCl}$ , control experiments were carried out to identify the origin of the optical and morphological differences:

1. Pt growth by selective  $\text{Ag}^+$  removal: after washing the nanorod dispersion as described in the main text of the paper, appropriate amounts of  $\text{KNO}_3$  and  $\text{HCl}$  were added to recover the original concentrations of  $\text{NO}_3^-$  and  $\text{HCl}$ . Subsequently, Pt deposition was carried out with Au:Pt molar ratios of 0.4 and 1.
2. Pt growth by recovery of starting conditions: after washing the nanorod dispersion as described in the main text of the paper, appropriate amounts of  $\text{AgNO}_3$  and  $\text{HCl}$  were added to recover the original concentrations of  $\text{NO}_3^-$  and  $\text{HCl}$ . Subsequently, Pt deposition was carried out with Pt:Au molar ratios of 0.4 and 1.0.

The UV-vis spectra and TEM images of the samples prepared following both routes are shown in Figures S1 and S2, respectively, confirming that growth without  $\text{Ag}^+$  leads to overcoating, while when  $\text{Ag}^+$  is present (even when added after washing), tip-coating is obtained.

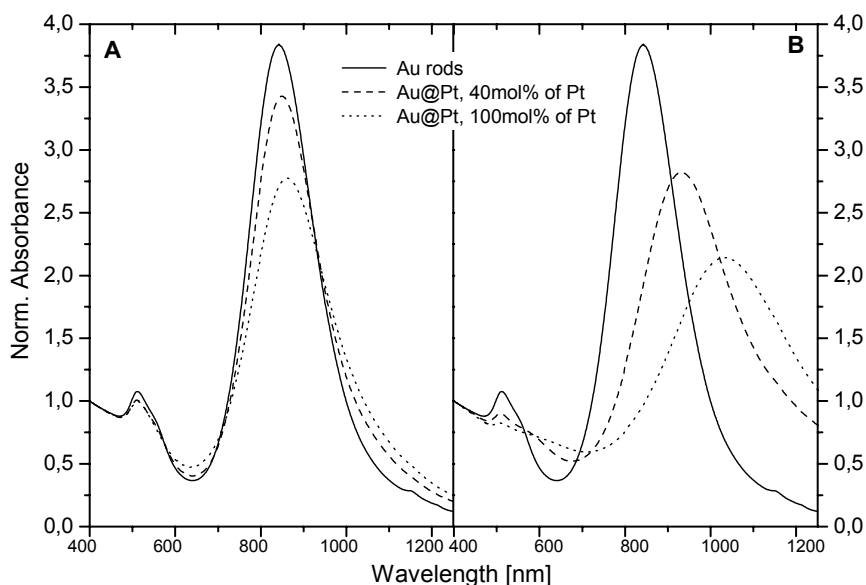

**Figure S1.** UV-vis spectra of gold nanorods coated with different amounts of platinum (40 and 100 mol%), in the absence (route 1, A) and in the presence (route 2, B) of  $\text{Ag}^+$ . All samples contain identical concentrations of  $\text{NO}_3^-$ ,  $\text{H}^+$  and  $\text{Cl}^-$ .

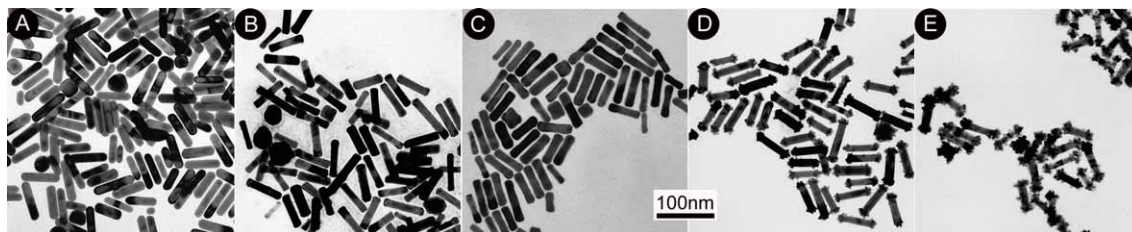

**Figure S2.** Representative TEM micrographs of the initial Au nanorods (A) and Au@Pt nanorods obtained in the absence (B,C), and in the presence (D,E) of  $\text{Ag}^+$ . The Pt:Au molar ratios are 0.4 (B,D) and 1.0 (C,E).

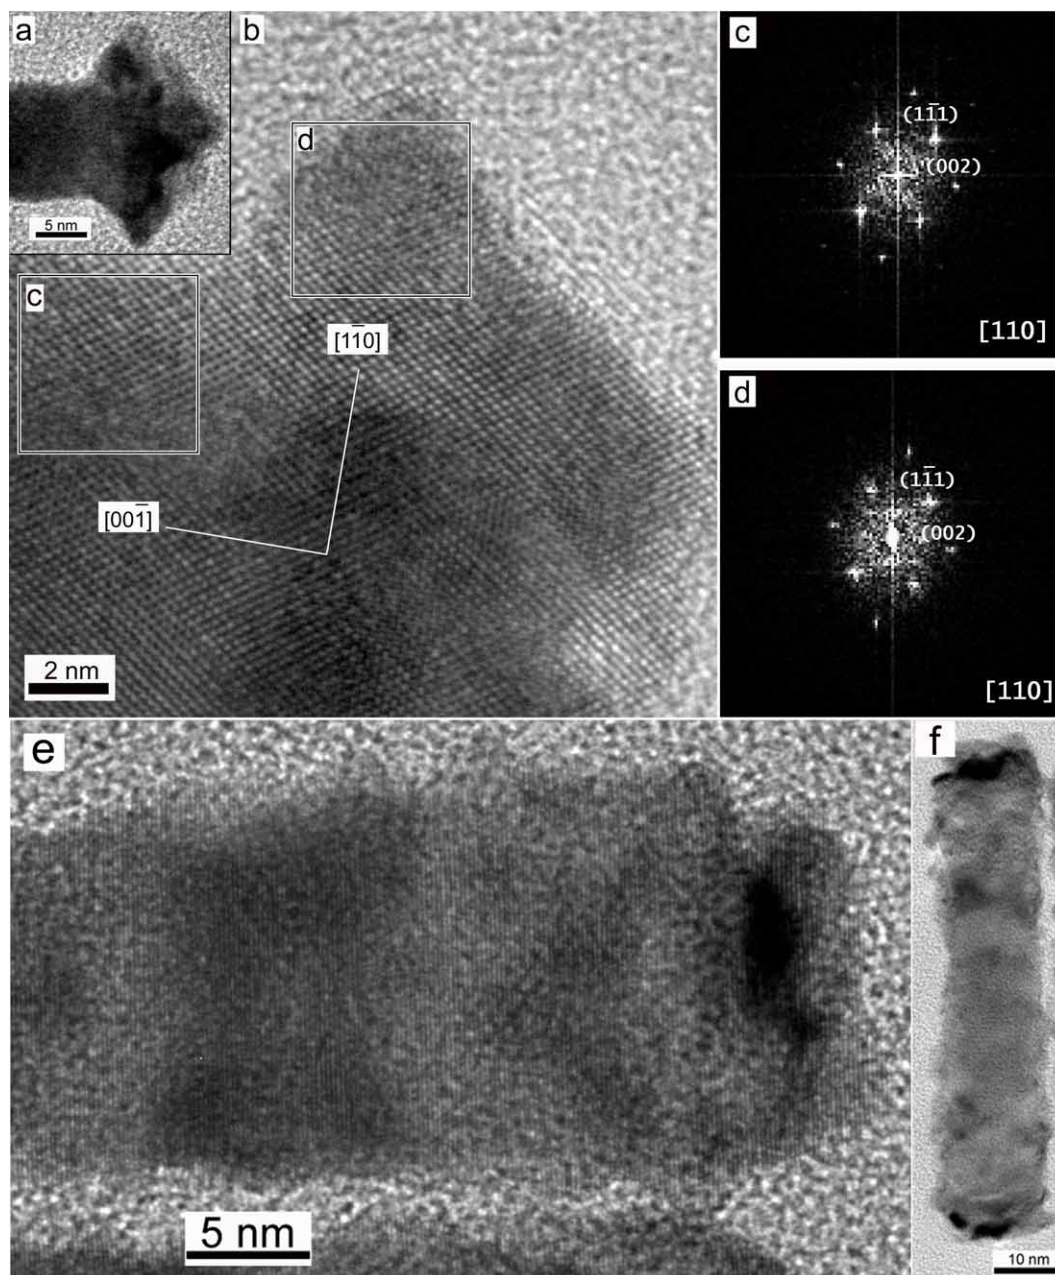

**Figure S3.** HRTEM images of Au nanorods coated with Pt in the presence (a,b) and in the absence (e,f) of  $\text{Ag}^+$ . (c,d) Power spectra in the [110] zone axis orientation from the middle part (c) and tip (d) of Au/Pt rods, taken from the areas indicated in image (b).

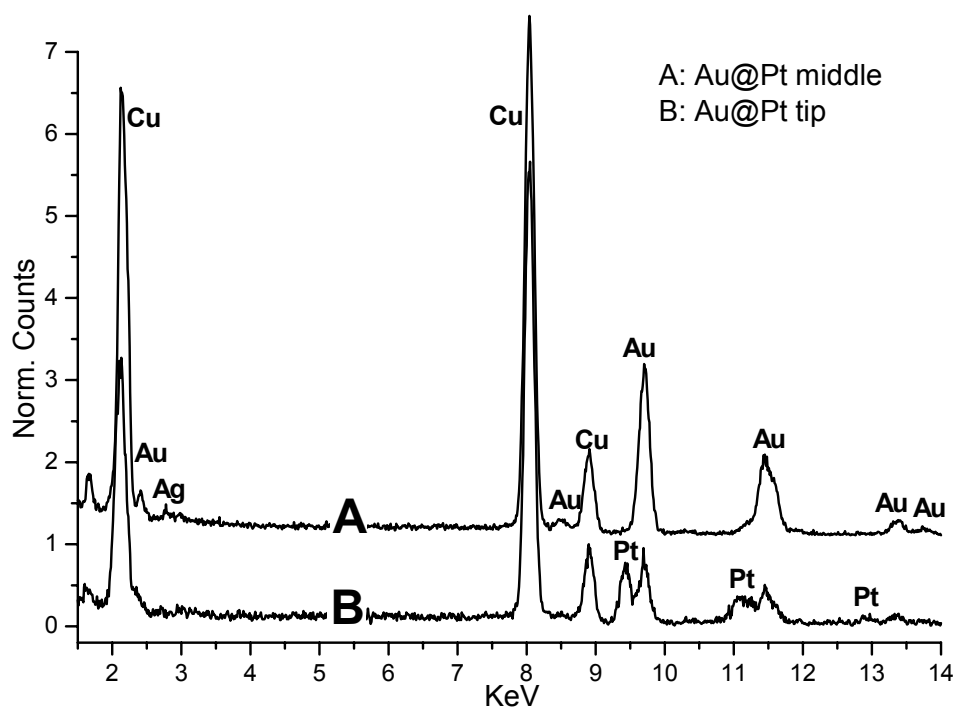

**Figure S4.** EDS spectra of middle part (A) and tip (B) of coated gold nanorods with platinum in the presence of  $\text{Ag}^+$  ions. Note the different ratio between peak intensities for Au and Pt. Also note that sensitivity is probably too low for the detection of metallic silver.
